# Supplementary material
Source: PubMed Central journal article supplement (PMC1194903)
Supplement: pnas_0500722102_4.pdf [file pnas_0500722102_4.pdf]

**Table 2. Statistics of BlrB structure determination**

|                                                                                    | Native                                        | Heavy atom derivatives                        |                       |                                               |                       |                                               |
|------------------------------------------------------------------------------------|-----------------------------------------------|-----------------------------------------------|-----------------------|-----------------------------------------------|-----------------------|-----------------------------------------------|
|                                                                                    | Dark                                          | EMP                                           |                       | KAu(CN) <sub>2</sub>                          |                       | Uranyl-acetate                                |
| PDB ID code                                                                        | 2byc                                          |                                               |                       |                                               |                       |                                               |
| Space group                                                                        | P2 <sub>1</sub> 2 <sub>1</sub> 2 <sub>1</sub> | P2 <sub>1</sub> 2 <sub>1</sub> 2 <sub>1</sub> |                       | P2 <sub>1</sub> 2 <sub>1</sub> 2 <sub>1</sub> |                       | P2 <sub>1</sub> 2 <sub>1</sub> 2 <sub>1</sub> |
| Cell parameters:<br>a,b,c, Å                                                       | 36.6, 65.0, 106.9                             | 36.7, 65.8, 107.0                             |                       | 36.8, 65.5, 106.6                             |                       | 36.7, 64.8, 106.3                             |
| Beamline                                                                           | SLS<br>XSA 06                                 | ESRF<br>ID 23-1                               |                       | SLS<br>XSA 06                                 |                       | ESRF<br>ID 23-1                               |
| Wavelength, Å                                                                      | 1.071                                         | peak<br>1.0052                                | inflection<br>1.00884 | peak<br>0.90189                               | inflection<br>0.90224 | 1.722                                         |
| Resolution of data, Å                                                              | 20-1.9                                        | 10-2.3                                        | 10-2.5                | 10-2.8                                        | 10-2.8                | 10-2.3                                        |
| No. of observations/<br>unique reflections                                         | 65,242/<br>20,247                             | 51,700/<br>22,000                             | 40,800/<br>17,100     | 34,800/<br>12,100                             | 34,800/<br>12,150     | 83,500/<br>17,000                             |
| Completeness,<br>total / high %*                                                   | 97.1/ 98.8                                    | 99.4/ 99.8                                    | 98.7/ 98.9            | 99.1/ 99.4                                    | 99.1/ 99.4            | 99.5/ 99.7                                    |
| $\langle I/\sigma(I) \rangle$ , total/high %*                                      | 8.6 / 3.9                                     | 11.7 / 5.6                                    | 12.3 / 4.6            | 15.3 / 5.0                                    | 15.3 / 5.0            | 12.0 / 4.7                                    |
| $R_{\text{sym}}$ , † total/high %*                                                 | 9.4 / 31.9                                    | 8.8 / 23.7                                    | 10.9 / 34             | 5.4 / 21.3                                    | 9.7 / 31.9            | 6.0 / 32.6                                    |
| Heavy atom conc., mM;<br>soaking time, h                                           |                                               | 5 mM, 1h                                      |                       | 2 mM, 12h                                     |                       | 3mM, 1h                                       |
| No. of heavy atoms                                                                 |                                               | 2                                             |                       | 3                                             |                       | 4                                             |
| FOM acentric/centric                                                               | 0.27/0.28                                     |                                               |                       |                                               |                       |                                               |
| Phasing power (full<br>resolution range)<br>ISO acentric/centric<br>ANISO acentric |                                               | 1.09/ 0.92 (dark)<br>0.93 (dark)              |                       | 0.72/ 0.59 (dark)<br>0.68 (dark)              |                       | 0.31/ 0.27 (dark)<br>0.25 (dark)              |
| Resolution range, Å                                                                | 15-1.9                                        |                                               |                       |                                               |                       |                                               |
| Included amino acids ‡                                                             | 0-136 mol A<br>0-131 mol B                    |                                               |                       |                                               |                       |                                               |
| No. of atoms/waters                                                                | 2,316/102                                     |                                               |                       |                                               |                       |                                               |
| $R_{\text{work}}/R_{\text{free}}$ , % ‡                                            | 23.1/28.8                                     |                                               |                       |                                               |                       |                                               |
| rms deviation for bonds,<br>Å/angles, °                                            | 0.025/2.6                                     |                                               |                       |                                               |                       |                                               |

$${}^\dagger R_{sym} = \frac{\sum_{hkl} \sum_i |I_i(hkl) - \overline{I(hkl)}|}{\sum_{hkl} \sum_i I_i(hkl)}$$

FOM, Figure of Merit. \*, High resolution shell dark1: 1.9-2.0 Å. †, The first residue is an additional Phe, resulting from the cloning strategy. ‡, with 5% of reflections in the test set. The  $R_{free}$  values are relatively high. They do not decrease when applying different resolution or sigma cutoffs (high and/or low) or inclusion of (partial) noncrystallographic symmetry (NCS). Although we found only relatively few water molecules, there are no unexplained peaks in  $F_{obs} - F_{calc}$  electron density maps. There is no indication for twinning, moreover, the  $R_{sym}$  and  $R_{free}$  values do not decrease for analyzing the data in any of the three monoclinic possibilities. The high R factors may be caused by the translational NCS (0.5, 0.5, 0.007) that relates the two monomers in the asymmetric unit (6), because it causes a departure from the assumption of randomly distributed atoms that underlies the usual interpretation of R factors (7). Refinement to 2 Å resolution results in  $R_{work} = 21.8$  and  $R_{free} = 27.8$ . Radiation damage may also affect the refinement statistics, it gets worse when including more data.
