# Supplementary material
Source: PubMed Central journal article supplement (PMC1194903)
Supplement: pnas_0500722102_5.pdf [file pnas_0500722102_5.pdf]

**Table 3. Sequence space analysis of more than 50 BLUF domains identified by PFAM allows identification of three BLUF subfamilies**

| Subfamily     | Class   | Members of subfamily/class |                    |
|---------------|---------|----------------------------|--------------------|
| Subfamily I   |         | Egym_pac_alpha_BLUF1       | Kq_pac_alpha_BLUF1 |
| BLUF1         |         | Egym_pac_beta_BLUF1        | Kq_pac_beta_BLUF1  |
|               |         | Ev_pac_alpha_BLUF1         | Eg_pac_alpha_BLUF1 |
|               |         | Ev_pac_beta_BLUF1          | Eg_pac_beta_BLUF1  |
|               |         | Cs_pac_alpha_BLUF1         | Es_pac_alpha_BLUF1 |
|               |         | Cs_pac_beta_BLUF1          | Es_pac_beta_BLUF1  |
|               |         | Al_pac_beta_BLUF1          |                    |
| Subfamily II  |         | Cs_pac_alpha_BLUF2         | Kq_pac_alpha_BLUF2 |
| BLUF2         |         | Cs_pac_beta_BLUF2          | Kq_pac_beta_BLUF2  |
|               |         | Egym_pac_alpha_BLUF2       | Eg_pac_alpha_BLUF2 |
|               |         | Egym_pac_beta_BLUF2        | Eg_pac_beta_BLUF2  |
|               |         | Ev_pac_alpha_BLUF2         | Es_pac_alpha_BLUF2 |
|               |         | Ev_pac_beta_BLUF2          | Es_pac_beta_BLUF2  |
|               |         | Al_ac_beta_BLUF2           |                    |
| Subfamily III | Class A | <b>Rs_BlrB</b>             |                    |
|               |         | Rs_BlrA                    |                    |
|               |         | Ec_YcgF                    |                    |
|               | Class B | <b>Rs_AppA</b>             | Ce_hp              |
|               |         | Se_TII0078                 | As_hp              |
|               |         | So_ea                      | As93A2_hp          |
|               |         | Rp_aop1                    | Bb_hp              |
|               |         | Rp_aop2                    | Cv_hp              |
|               |         | Rp_aop3                    | Rb_hp              |
|               |         | Lx_aop                     | Xa_XAC3278         |
|               |         | <b>Slr1694</b>             | Xa_XAC2120         |
|               |         | uncult                     |                    |

Subfamily I consists of BLUF I domains originating from diverse putative photoactivated adenylyl-cyclases (PACs), whereas subfamily II encompasses the BLUF II domains of these systems. All non-PAC BLUF-domains, including BlrB\_BLUF, AppA\_BLUF, and Slr1694\_BLUF (marked yellow) belong to subfamily III.

|                      |                                                         |
|----------------------|---------------------------------------------------------|
| Egym_pac_alpha_BLUF1 | <i>Eutreptiella gymnastica</i> PAC alpha subunit, BLUF1 |
| Egym_pac_beta_BLUF1  | <i>Eutreptiella gymnastica</i> PAC beta subunit, BLUF1  |
| Ev_pac_alpha_BLUF1   | <i>Eutreptia viridis</i> PAC alpha subunit, BLUF1       |
| Ev_pac_beta_BLUF1    | <i>Eutreptia viridis</i> PAC beta subunit, BLUF1        |
| Cs_pac_alpha_BLUF1   | <i>Colacium sideropus</i> PAC alpha subunit, BLUF1      |
| Cs_pac_beta_BLUF1    | <i>Colacium sideropus</i> PAC beta subunit, BLUF1       |
| Al_pac_beta_BLUF1    | <i>Astasia longa</i> PAC beta subunit, BLUF1            |
| Kq_pac_alpha_BLUF1   | <i>Khawkinea quartana</i> PAC alpha subunit, BLUF1      |
| Kq_pac_beta_BLUF1    | <i>Khawkinea quartana</i> PAC beta subunit, BLUF1       |
| Eg_pac_alpha_BLUF1   | <i>Euglena gracilis</i> PAC alpha subunit, BLUF1        |
| Eg_pac_beta_BLUF1    | <i>Euglena gracilis</i> PAC beta subunit, BLUF1         |
| Es_pac_alpha_BLUF1   | <i>Euglena stellata</i> PAC alpha subunit, BLUF1        |
| Es_pac_beta_BLUF1    | <i>Euglena stellata</i> PAC beta subunit, BLUF1         |

|                      |                                                         |
|----------------------|---------------------------------------------------------|
| Egym_pac_alpha_BLUF2 | <i>Eutreptiella gymnastica</i> PAC alpha subunit, BLUF2 |
| Egym_pac_beta_BLUF2  | <i>Eutreptiella gymnastica</i> PAC beta subunit, BLUF2  |
| Ev_pac_alpha_BLUF2   | <i>Eutreptia viridis</i> PAC alpha subunit, BLUF2       |
| Ev_pac_beta_BLUF2    | <i>Eutreptia viridis</i> PAC beta subunit, BLUF2        |
| Cs_pac_alpha_BLUF2   | <i>Colacium sideropus</i> PAC alpha subunit, BLUF2      |
| Cs_pac_beta_BLUF2    | <i>Colacium sideropus</i> PAC beta subunit, BLUF2       |
| Al_pac_beta_BLUF2    | <i>Astasia longa</i> PAC beta subunit, BLUF2            |
| Kq_pac_alpha_BLUF2   | <i>Khawkinea quartana</i> PAC alpha subunit, BLUF2      |
| Kq_pac_beta_BLUF2    | <i>Khawkinea quartana</i> PAC beta subunit, BLUF2       |
| Eg_pac_alpha_BLUF2   | <i>Euglena gracilis</i> PAC alpha subunit, BLUF2        |
| Eg_pac_beta_BLUF2    | <i>Euglena gracilis</i> PAC beta subunit, BLUF2         |

|                    |                                                                                                         |
|--------------------|---------------------------------------------------------------------------------------------------------|
| Es_pac_alpha_BLUF2 | <i>Euglena stellata</i> PAC alpha subunit, BLUF2                                                        |
| Es_pac_beta_BLUF2  | <i>Euglena stellata</i> PAC beta subunit, BLUF2                                                         |
| Rs_BlrB            | <i>Rhodobacter sphaeroides</i> BlrB                                                                     |
| Rs_BlrA            | <i>Rhodobacter sphaeroides</i> BlrA                                                                     |
| Ec_YcgF            | <i>E. coli</i> YcgF                                                                                     |
| Rs_AppA            | <i>Rhodobacter sphaeroides</i> AppA                                                                     |
| Se_THI0078         | <i>Synechococcus elongatus</i> protein                                                                  |
| So_ea              | <i>Shewanella oneidensis</i> expression activator                                                       |
| Rp_aop             | <i>Rhodopseudomonas palustris</i> activator of puc exp                                                  |
| Rp_aop2            |                                                                                                         |
| Rp_aop3            |                                                                                                         |
| Lx_aop             | <i>Leifsonia xyli</i> activator of puc expression                                                       |
| Slr1694            | <i>Synechocystis</i> sp. 1694                                                                           |
| uncult             | <i>Uncultured proteobacterium</i> hypothetical protein                                                  |
| Ce_hp              | <i>Corynebacterium efficiens</i> hypothetical protein                                                   |
| As_hp              | <i>Acinetobacter</i> sp. hypothetical protein                                                           |
| As93A2_hp          | <i>Acinetobacter</i> sp. 93A2 hypothetical protein                                                      |
| Bb_hp              | <i>Bdellovibrio bacteriovorus</i> hypothetical protein                                                  |
| Cv_hp              | <i>Chromobacterium violaceum</i> hypothetical protein                                                   |
| Rb_hp              | <i>Rhodopirellula baltica</i> hypothetical protein                                                      |
| Xa_XAC3278         | <i>Xanthomonas axonopodis</i> protein XAC3278                                                           |
| Xa_XAC2120         | <i>Xanthomonas axonopodis</i> protein XAC2120                                                           |
| Mx_USC2            | <i>Myxococcus xanthus</i> protein USC2-2p                                                               |
| St_ABC             | <i>Symbiobacterium thermophilum</i> glycine/betaine/carnitine ABC transporter substrate-binding protein |
| uncult_581_FADBD   | <i>uncultured bacterium</i> 581 putative FAD binding domain                                             |
