# Supplementary material
Source: PubMed Central journal article supplement (PMC1194903)

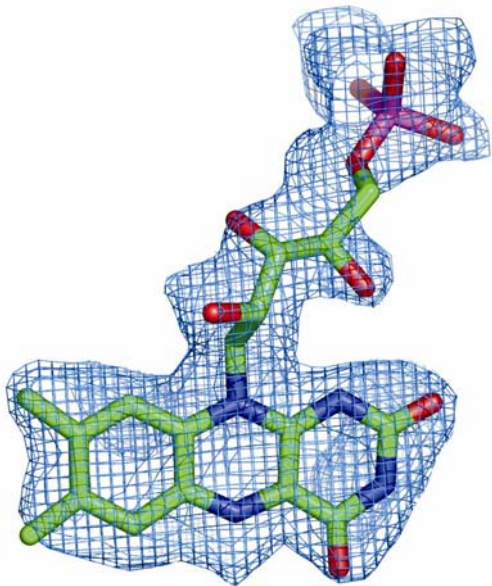

Supplement: pnas_0500722102_1.pdf [file pnas_0500722102_1.pdf]

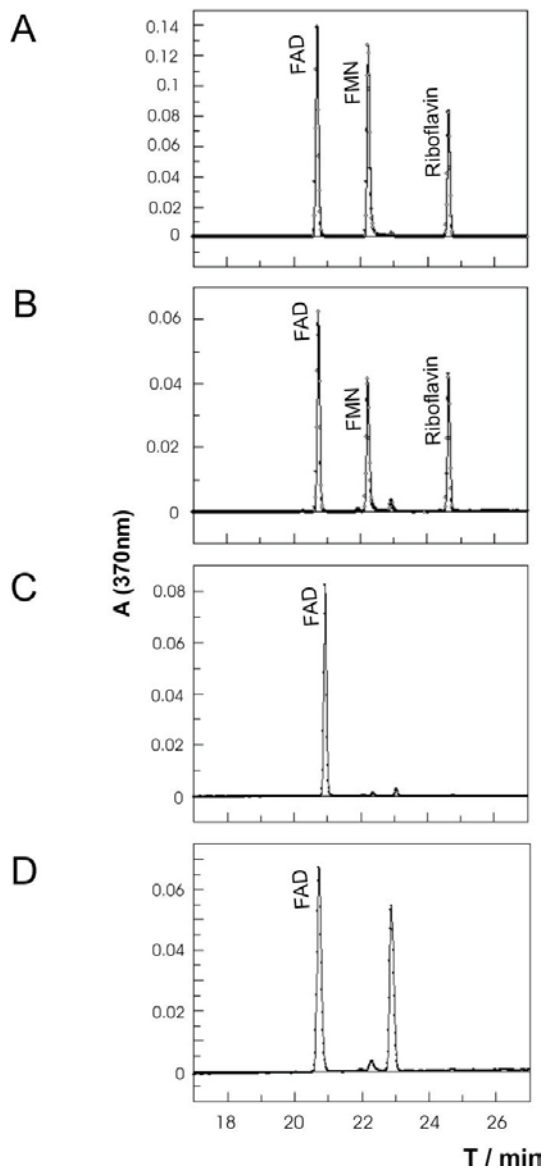

Supplement: pnas_0500722102_2.pdf [file pnas_0500722102_2.pdf]

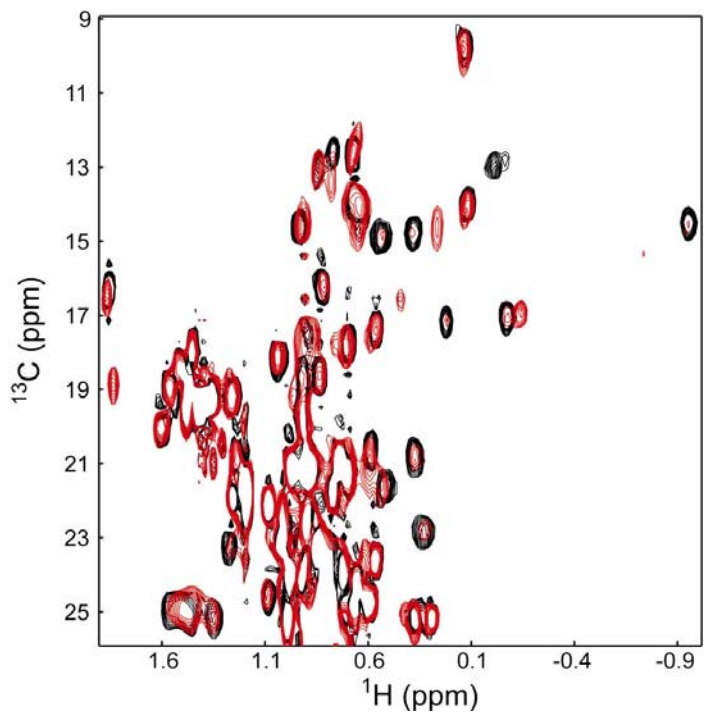

Supplement: pnas_0500722102_3.pdf [file pnas_0500722102_3.pdf]
